# Supplementary material for: Structural characterization, acute toxicity assessment and protective effects of selenylated apple pectin on dextran sulfate sodium-induced ulcerative colitis
Source: Royal Society of Chemistry journal article supplement (doi:10.1039/d1fo04189d), 2022-01-01
Supplement: d1fo04189d1.pdf [file d1fo04189d1.pdf]

## Supplementary materials

### **Structural characterization, acute toxicity assessment and protective effects of selenylated apple pectin on dextran sulfate sodium-induced ulcerative colitis**

Wen Tao<sup>1</sup>, Xiaoyu An<sup>1</sup>, Ziqi Guo<sup>1</sup>, Ning Yang<sup>2</sup>, Muci Wu<sup>1,2</sup>, Hélder Oliveira<sup>3</sup>, Rui Zhang<sup>1,2\*</sup>, Jingren He<sup>1,2\*</sup>

<sup>1</sup>National R&D Center for Se-rich Agricultural Products Processing, Hubei Engineering Research Center for Deep Processing of Green Se-rich Agricultural Products, School of Modern Industry for Selenium Science and Engineering, Wuhan Polytechnic University, No.36 Huanhu Middle Road, Jinyinhu District, Wuhan 430023, P. R. China;

<sup>2</sup>Key Laboratory for Deep Processing of Major Grain and Oil, Ministry of Education, Hubei Key Laboratory for Processing and Transformation of Agricultural Products, Wuhan Polytechnic University, No.36 Huanhu Middle Road, Jinyinhu District, Wuhan 430023, P. R. China;

<sup>3</sup>LAQV, REQUIMTE, Departamento de Química e Bioquímica, Faculdade de Ciências, Universidade do Porto, Rua do Campo Alegre s/n, 4169-007 Porto, Portugal.

\*Corresponding Author Address:

Dr. Rui Zhang

Wuhan Polytechnic University, No.36 Huanhu Middle Road, Jinyinhu District, Wuhan 430023, P. R. China;

E-mail: ruizhangwhpu@126.com

Prof. Jingren He

Wuhan Polytechnic University, No.36 Huanhu Middle Road, Jinyinhu District, Wuhan 430023, P. R. China;

E-mail: jingren.he@whpu.edu.cn

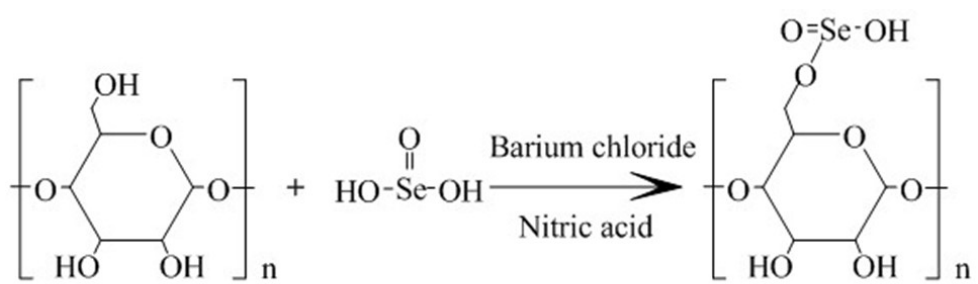

**Fig. S1.** Synthesis process of selenium-polysaccharide.

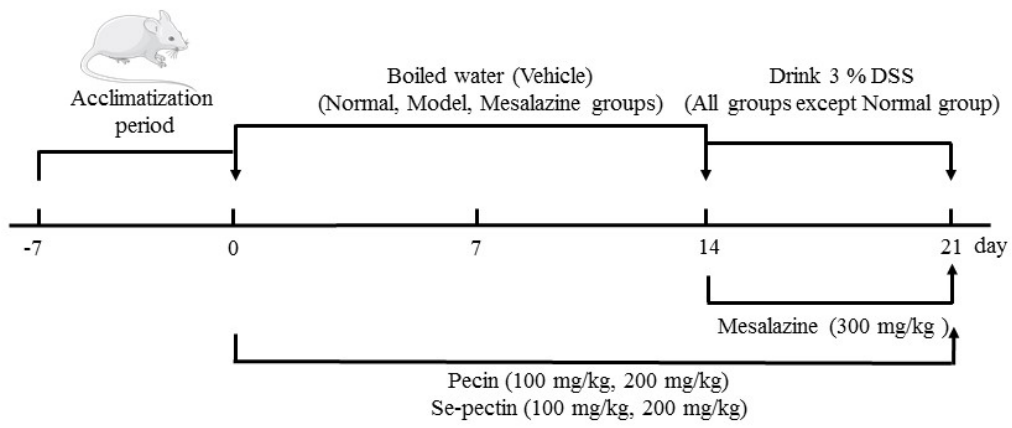

**Fig. S2.** The in vivo experimental scheme. Here, Pectin: non-selenylated apple pectin; Se-pectin: selenylated apple pectin.

*a)*

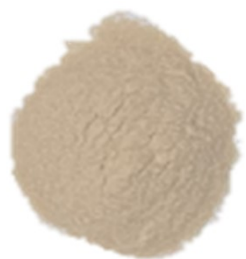

*b)*

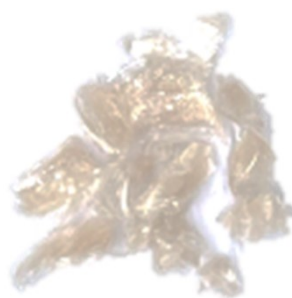

**Fig. S3.** The appearance of non-selenylated (a) and selenylated (b) apple pectins.

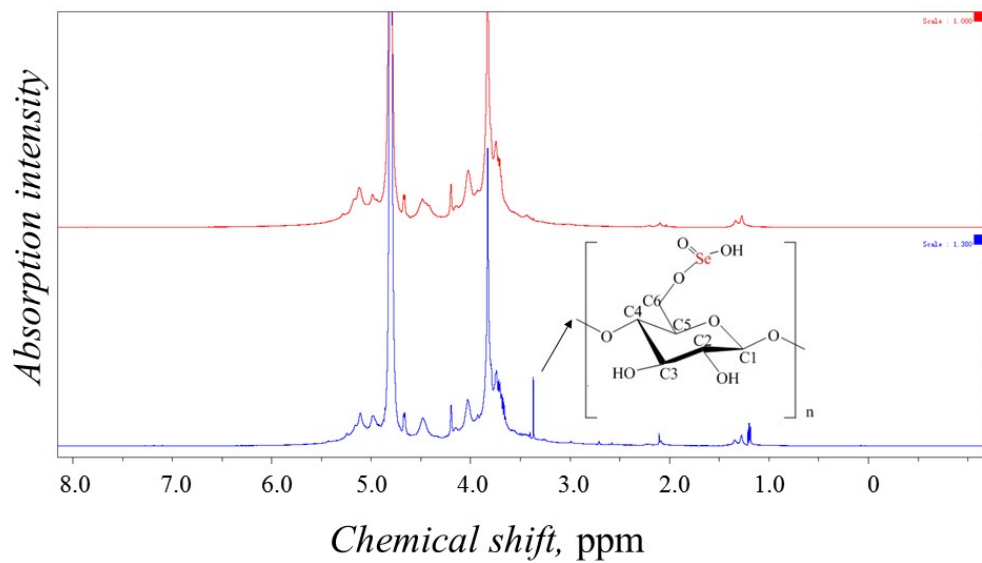

**Fig. S4.** One dimensional <sup>1</sup>H Nuclear Magnetic Resonance (1 D <sup>1</sup>H NMR) spectrum of non-selenylated (blue line) and selenylated (red line) apple pectins.

a)

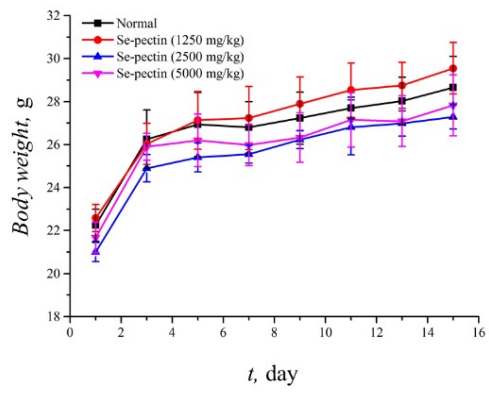

b)

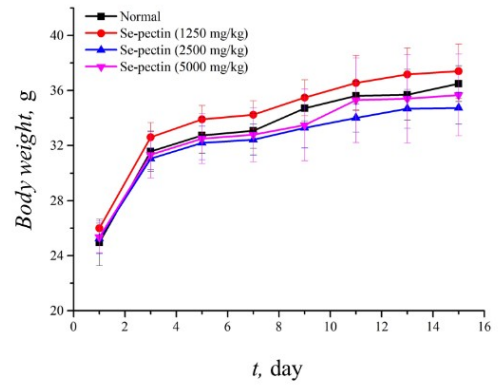

Fig. S5. Changes in body weight of female (a) and male (b) mice.

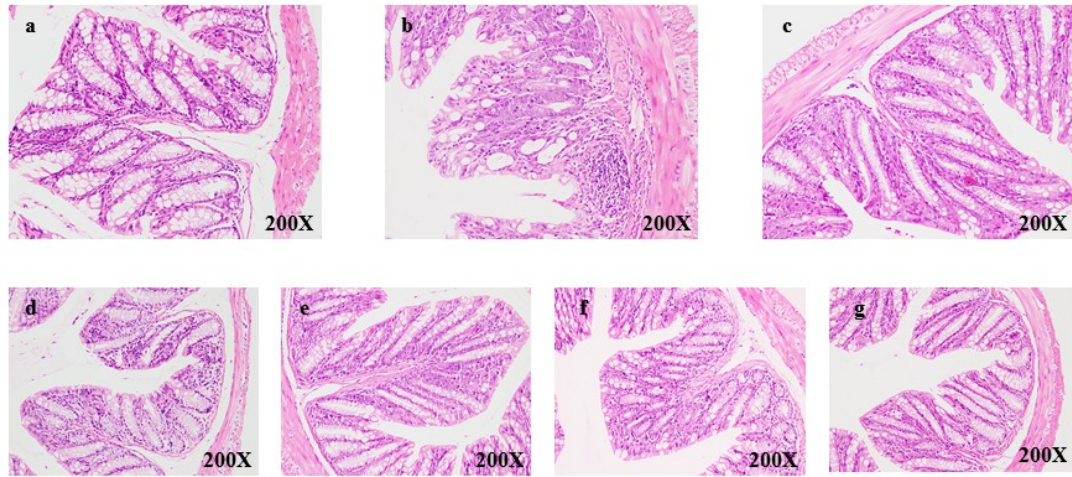

**Fig. S6.** Hematoxylin-Eosin stained colon tissues (Magnification 200 ×) in mice of Normal (a), Model (b), Mesalazine (300 mg/kg) (c), Pectin (100 mg/kg) (d), Pectin (200 mg/kg) (e), Se-pectin (100 mg/kg) (f) and Se-pectin (200 mg/kg) (g) groups.

**Table S1** Scoring standards of Disease Activity Index (DAI).

| Loss of body weight (%) | Fecal traits   | Hematochezia           | Score |
|-------------------------|----------------|------------------------|-------|
| 0                       | Normal         | Normal                 | 0     |
| 1~5                     | Soft stools    | Positive faint blood+  | 1     |
| 5~10                    | Crumbly stools | Positive faint blood++ | 2     |
| 10~15                   | Loose stools   | Slight blood           | 3     |
| >15                     | Diarrhoea      | Apparent blood         | 4     |



**Table S2** The relative molecular weight distribution of non-selenylated and selenylated apple pectins.

| Samples                      | Time (min)    | Molecular weight (Da)                   | Content (%) |
|------------------------------|---------------|-----------------------------------------|-------------|
| Non-selenylated apple pectin | 6.82 - 7.80   | $1.30 \times 10^7 \pm 8.17 \times 10^4$ | 2.8         |
|                              | 8.00 - 14.04  | $5.17 \times 10^5 \pm 4.77 \times 10^3$ | 56.1        |
|                              | 14.27 - 19.05 | $6.49 \times 10^4 \pm 6.16 \times 10^3$ | 23.6        |
|                              | 19.05 - 23.40 | $1.88 \times 10^4 \pm 2.96 \times 10^3$ | 17.4        |
| Selenylated apple pectin     | 7.04 - 8.09   | $2.54 \times 10^7 \pm 2.23 \times 10^5$ | 3.3         |
|                              | 8.09 - 16.29  | $6.03 \times 10^5 \pm 6.89 \times 10^3$ | 91.5        |
|                              | 16.29 - 19.30 | $3.30 \times 10^5 \pm 3.25 \times 10^4$ | 1.9         |
|                              | 19.30 - 22.66 | $4.55 \times 10^4 \pm 9.67 \times 10^3$ | 3.3         |

**Table S3** Monosaccharide composition and content of non-selenylated and selenylated apple pectins. Here, Rha-Rhamnose, Ara-Arabinose, Gal-Galactose, Glc-Glucose, Xyl-Xylose, GalA-Galacturonic acid.

| Samples                      | Monosaccharide composition and content |      |       |      |      |       |
|------------------------------|----------------------------------------|------|-------|------|------|-------|
|                              | (mg/g <sub>sample</sub> )              |      |       |      |      |       |
|                              | Rha                                    | Ara  | Gal   | Glc  | Xyl  | GalA  |
| Non-selenylated apple pectin | 39.1                                   | 12.4 | 224.8 | 70.2 | 81.2 | 465.6 |
| Selenylated apple pectin     | 27.7                                   | 3.6  | 192.9 | 57.4 | 51.4 | 553.4 |

**Table S4** Effects of selenylated apple pectin of three doses on organ coefficients of mice.

| Gender | Group                  | Heart (%)              | Liver (%)              | Spleen (%)             | Kidney (%)             | Intestines (%)         |
|--------|------------------------|------------------------|------------------------|------------------------|------------------------|------------------------|
| Male   | Normal                 | 0.54±0.03 <sup>a</sup> | 4.30±0.27 <sup>a</sup> | 0.44±0.05 <sup>a</sup> | 1.19±0.09 <sup>a</sup> | 7.56±0.68 <sup>a</sup> |
|        | Se-pectin (1250 mg/kg) | 0.48±0.03 <sup>a</sup> | 4.23±0.03 <sup>a</sup> | 0.40±0.07 <sup>a</sup> | 1.18±0.09 <sup>a</sup> | 7.94±0.75 <sup>a</sup> |
|        | Se-pectin (2500 mg/kg) | 0.53±0.09 <sup>a</sup> | 4.12±0.16 <sup>a</sup> | 0.37±0.05 <sup>a</sup> | 1.15±0.08 <sup>a</sup> | 8.06±0.48 <sup>a</sup> |
|        | Se-pectin (5000 mg/kg) | 0.52±0.04 <sup>a</sup> | 4.09±0.17 <sup>a</sup> | 0.35±0.03 <sup>a</sup> | 1.19±0.10 <sup>a</sup> | 7.48±0.95 <sup>a</sup> |
| Female | Normal                 | 0.49±0.06 <sup>a</sup> | 4.53±0.59 <sup>a</sup> | 0.31±0.03 <sup>a</sup> | 1.32±0.03 <sup>a</sup> | 7.49±0.48 <sup>a</sup> |
|        | Se-pectin (1250 mg/kg) | 0.49±0.09 <sup>a</sup> | 4.44±0.33 <sup>a</sup> | 0.29±0.03 <sup>a</sup> | 1.42±0.02 <sup>a</sup> | 7.33±0.27 <sup>a</sup> |
|        | Se-pectin (2500 mg/kg) | 0.55±0.07 <sup>a</sup> | 4.62±0.33 <sup>a</sup> | 0.32±0.04 <sup>a</sup> | 1.53±0.02 <sup>a</sup> | 7.59±0.97 <sup>a</sup> |
|        | Se-pectin (5000 mg/kg) | 0.53±0.06 <sup>a</sup> | 4.71±0.08 <sup>a</sup> | 0.31±0.04 <sup>a</sup> | 1.54±0.26 <sup>a</sup> | 7.28±0.47 <sup>a</sup> |

Date are expressed as the mean ± SD.
